# Supplementary material for: An optimized LSTM network for improving arbitrage spread forecasting using ant colony cross-searching in the K-fold hyperparameter space
Source: PeerJ journal article supplement (doi:10.7717/peerj-cs.2215), 2024-08-09
Supplement: cec19.zip [file result.pdf › cec19/result.pdf]

Since the Modified Schwefel's Function of CEC19 has a negative optimization result, it is not applicable to the KCS algorithm. And we only selected the remaining nine functions for testing. The CEC19 test function is provided by the third-party library `opfunu` in Python. The dimensions of each function and search range are shown in Table 1. We tested three functions in total: ACO, KCS and Ant Colony Optimization Continuous (ACOR). Among them, ACO is the traditional ACO algorithm (heuristic functions for computing probability matrices are not included in this paper, as heuristic function design is often difficult for black-box models). ACOR is a variant of ACO provided by `mealpy`, a third-party library for Python. In addition, due to the large distribution of fitness, the Q value in the KCS algorithm is dynamically adjusted as the hyperparameter space converges. The number of populations for all algorithms is 50. In order to guarantee the reliability of the experimental results, each algorithm's search for the CEC19 function was performed 30 times independently. And we calculated the mean and standard deviation of its searched global optimal fitness, which are shown in Table 2.

**Table 1.** CEC2019 test functions.

| No. | Functions                                    | Dim | Search Range   |
|-----|----------------------------------------------|-----|----------------|
| 1   | Storn's Chebyshev Polynomial Fitting Problem | 9   | [-8192,8192]   |
| 2   | Inverse Hilbert Matrix Problem               | 16  | [-16384,16384] |
| 3   | Lennard-Jones Minimum Energy Cluster         | 18  | [-4,4]         |
| 4   | Rastrigin's Function                         | 10  | [-100,100]     |
| 5   | Griewangk's Function                         | 10  | [-100,100]     |
| 6   | Weierstrass Function                         | 10  | [-100,100]     |
| 7   | Expanded Schaffer's F6 Function              | 10  | [-100,100]     |
| 8   | Happy Cat Function                           | 10  | [-100,100]     |
| 9   | Ackley Function                              | 10  | [-100,100]     |

The N value in the table indicates how many times CEC19 was queried when the optimization algorithm first searched for best fitness. ‘\*’ indicates that the algorithm has reached the maximum number of iterations. At 1000 iterations, both ACO and ACOR achieved minimum fitness on four functions and KCS achieved minimum fitness on only one function. With the maximum number of queries available for the CEC19 functions of 250,000, ACO achieves the minimum fitness on three functions, ACOR achieves the minimum fitness on all four functions and KCS achieves the minimum fitness on two functions. However, with an increase in the number of iterations, the maximum improvement of ACO in CEC19 functions is only 5.3%, except for F8. Additionally, the effect of individual functions becomes worse. The ACO algorithm's dependence on the number of populations is the reason for this situation. For both KCS and ACOR, the search results improve as the number of iterations increases. Finally, The poor performance of the KCS algorithm on the CEC19 test function can be attributed to its focus on global search with poor local exploration.

**Table 2.** Avg and Std results using CEC 2019 test functions.

| CEC19<br>function | global<br>best<br>fitness | 1000 iterations |                |              | 5000 iterations |              | 10000<br>iterations |
|-------------------|---------------------------|-----------------|----------------|--------------|-----------------|--------------|---------------------|
|                   |                           | ACO             | KCS            | ACOR         | ACO             | KCS          | ACOR                |
| F1                | Avg                       | 13207022        | <b>2828146</b> | 16479268     | 12513435        | 2716626      | <b>1056901</b>      |
|                   | std                       | 12988350        | 3780442        | 6676532      | 10168788        | 2787377      | 1294822             |
|                   | N                         | 6200            | 31293*         | 18051        | 4150            | 141626       | 241391              |
| F2                | Avg                       | <b>527</b>      | 827            | 1133         | 679             | <b>521</b>   | 605                 |
|                   | std                       | 277.86          | 477.75         | 187.54       | 401.42          | 160.58       | 126.04              |
|                   | N                         | 6200            | 33952*         | 13476        | 4300            | 156113*      | 147216              |
| F3                | Avg                       | 10.72           | 13.50          | <b>10.60</b> | 10.45           | 12.92        | <b>5.27</b>         |
|                   | std                       | 0.774           | 0.377          | 0.759        | 1.077           | 0.570        | 0.427               |
|                   | N                         | 3250            | 31407*         | 16551        | 1760            | 116616       | 177651              |
| F4                | Avg                       | 122.62          | 111.54         | <b>39.59</b> | 209.68          | <b>19.24</b> | 25.02               |
|                   | std                       | 157.27          | 115.28         | 3.73         | 350.70          | 14.84        | 3.35                |
|                   | N                         | 5250            | 31250*         | 16076        | 3150            | 104603       | 152892              |
| F5                | Avg                       | <b>1.11</b>     | 2.26           | 1.57         | <b>1.11</b>     | 2.14         | 1.45                |
|                   | std                       | 0.055           | 0.142          | 0.081        | 0.057           | 0.105        | 0.080               |
|                   | N                         | 5250            | 29660*         | 12501        | 3150            | 126484       | 100014              |
| F6                | Avg                       | <b>3.65</b>     | 20.09          | 10.85        | <b>3.73</b>     | 7.73         | 9.66                |
|                   | std                       | 1.198           | 2.514          | 0.895        | 1.037           | 2.188        | 0.50                |
|                   | N                         | 5250            | 29139*         | 10826        | 3150            | 123547       | 116604              |
| F7                | Avg                       | 1.001           | 1.106          | <b>1.000</b> | 1.000           | 1.068        | <b>1</b>            |
|                   | std                       | 0.0025          | 0.0369         | 3.73e-16     | 0.0012          | 0.0357       | 0                   |
|                   | N                         | 5250            | 29512*         | 24826        | 3150            | 127795       | 25059               |
| F8                | Avg                       | 6.53            | 2.94           | <b>1.30</b>  | 4.45            | 1.75         | <b>1.15</b>         |
|                   | std                       | 9.527           | 1.595          | 0.052        | 4.325           | 1.216        | 2.79e-02            |
|                   | N                         | 5200            | 31384*         | 19451        | 3100            | 103662       | 179301              |
| F9                | Avg                       | <b>20.95</b>    | 22.75          | 21.45        | <b>20.89</b>    | 22.47        | 21.30               |
|                   | std                       | 0.234           | 0.166          | 0.087        | 0.416           | 0.291        | 0.051               |
|                   | N                         | 5250            | 28944*         | 13201        | 3150            | 133169       | 108366              |
